# Supplementary material for: Human and macaque pairs employ different coordination strategies in a transparent decision game
Source: eLife journal article supplement (doi:10.7554/elife.81641), 2023-01-12
Supplement: supp [file elife_poa_e81641_Supplementary_file_2.docx]

| Pair | Strategy | Macaque  A or Conf. | Conf. trained | Macaque B | Conf. trained | Start  date | End  date | ATA, all trials | ATB, all trials | Test on  ATA vs. ATB | | | ATA – ATB  all trials |
| --- | --- | --- | --- | --- | --- | --- | --- | --- | --- | --- | --- | --- | --- |
| mean | mean | df (corr.) | t | p | mean |
| *column* | *2* | *3* | *4* | *5* | *6* | *7* | *8* | *9* | *10* | *11* | *12* | *13* | *14* |
| FC | F's color | F |  | C |  | 20171019 | 20171103 | 489.6 | 517.4 | 580.2 | -4.7 | **<0.0001** | -27.8 |
| MC | M’s left side | M |  | C |  | 20171108 | 20180214 | 509.4 | 609.1 | 797.3 | -13.0 | **<0.0001** | -99.7 |
| MF | M’s left side | M |  | F |  | 20171129 | 20180125 | 444.2 | 444.9 | 972.1 | -0.2 | 0.8242 | -0.6 |
| Conf-C | Blockwise turn-taking | Conf |  | C |  | 20171206 | 20180423 | 589.6 | 655.8 | 303.6 | -6.4 | **<0.0001** | -66.2 |
| Conf-F | Blockwise turn-taking | Conf |  | F |  | 20180131 | 20180228 | 628.9 | 752.4 | 704.8 | -13.7 | **<0.0001** | -123.5 |
| FC-ct | Temporal competition | F | yes | C | yes | 20180418 | 20180427 | 573.1 | 592.5 | 1091.8 | -3.3 | **0.0011** | -19.3 |
| TF | T's color | T |  | F | yes | 20180504 | 20180509 | 493.0 | 769.9 | 415.9 | -37.9 | **<0.0001** | -276.9 |
| TE | T’s left side | T |  | E |  | 20180516 | 20180524 | 451.6 | 588.8 | 509.5 | -24.4 | **<0.0001** | -137.2 |
| TC | T's color | T |  | C | yes | 20180525 | 20180530 | 522.2 | 715.5 | 416.5 | -21.0 | **<0.0001** | -193.3 |
| CE | C’s left side | C | yes | E |  | 20180605 | 20180615 | 544.8 | 694.5 | 1001.5 | -26.5 | **<0.0001** | -149.7 |
| LE | L's color | L |  | E |  | 20181023 | 20181120 | 491.7 | 531.7 | 860.0 | -10.7 | **<0.0001** | -40.0 |
| CL | L's color | C | yes | L |  | 20181127 | 20181211 | 609.1 | 460.1 | 853.2 | 42.4 | **<0.0001** | 149.0 |

Supplementary File 2. Table S2: sequence of macaque pairings and confederate training sorted by the start date, and action times.

Columns 2-8: For each pair we show the joint strategy they converged on and the confederate-training status of each macaque agent (FC-ct: pair FC, confederate-trained, teal background). Macaque pairs converged on static coordination strategies even after one monkey in a pair has been confederate-trained. The confederate training however might have increased the willingness of the trained monkey to accommodate (in all 3 cases of static coordination on fixed color, the confederate-trained monkey followed to the partner’s color: pairs TF, TC, CL). Columns 9-14: Action times, action time differences, and the t-test on the mean AT differences between the two agents in each pair. All 5 pairs coordinating on the static color converged on the faster monkey’s preferred color. Likewise, for the static side coordination, all 3 (out of 4) pairs where there was a significant difference in action times between the two agents converged on the faster monkey’s less effortful side closer to the acting arm. This shows that the static coordination in macaques was shaped by the faster agent’s preferences.
