# Supplementary figures and images for: Human and macaque pairs employ different coordination strategies in a transparent decision game
Source: eLife journal article supplement (doi:10.7554/elife.81641), 2023-01-12

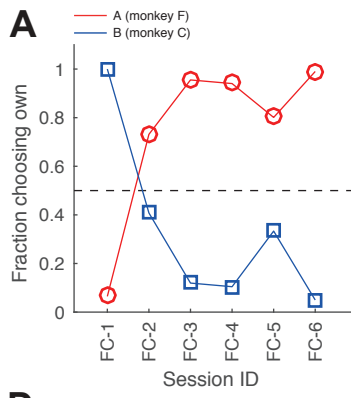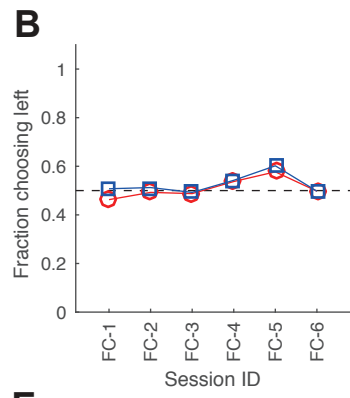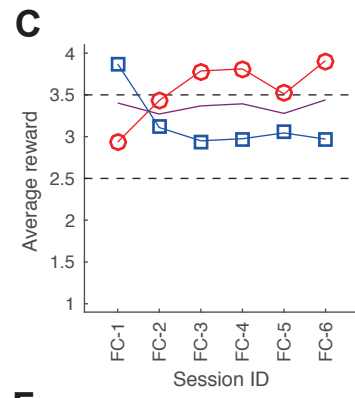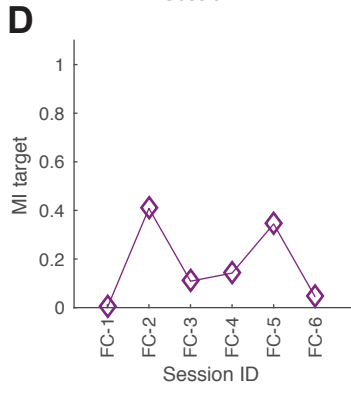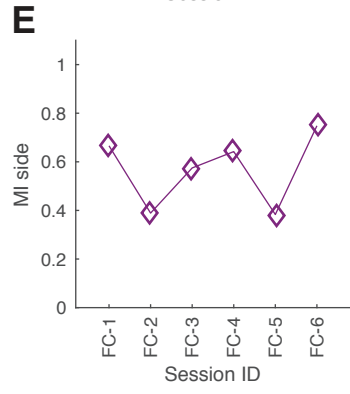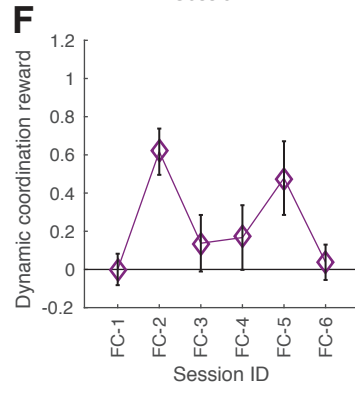

Supplement: supp [file elife-81641-supp-v1.zip]

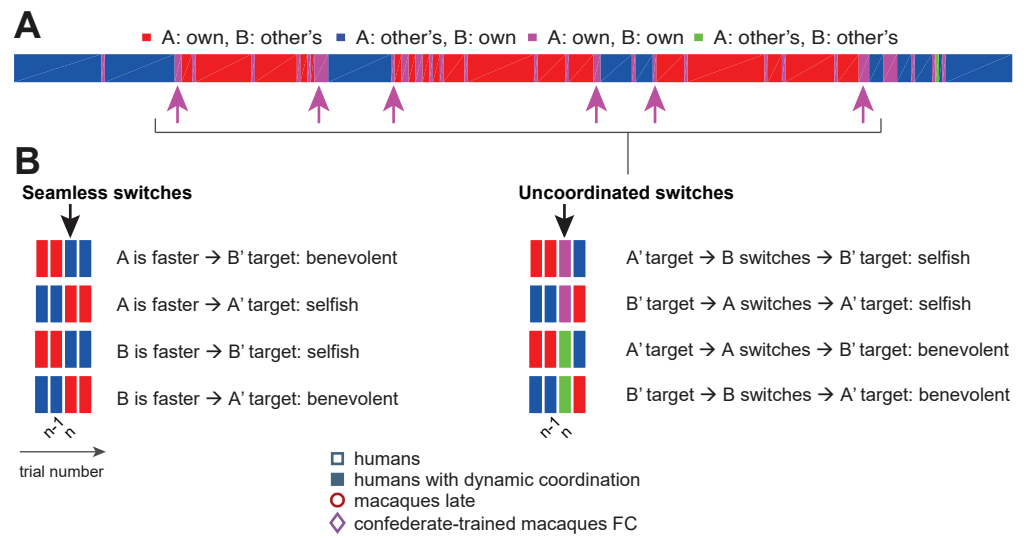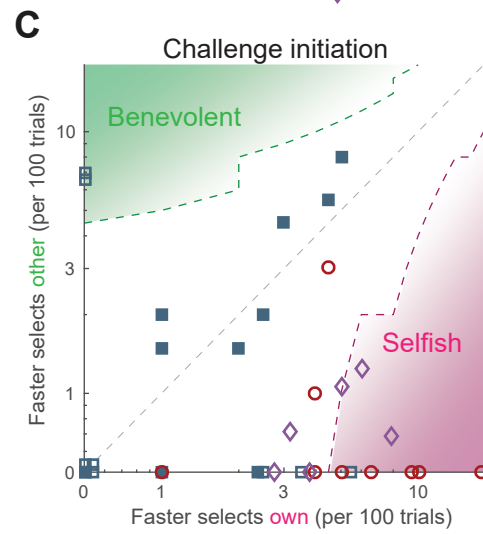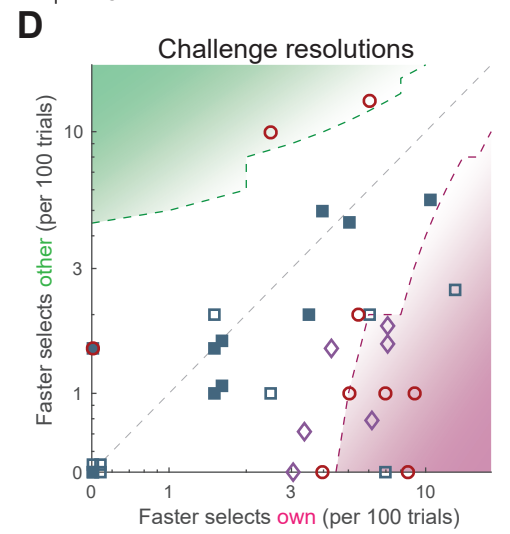

Supplement: supp [file elife-81641-supp-v1.zip]

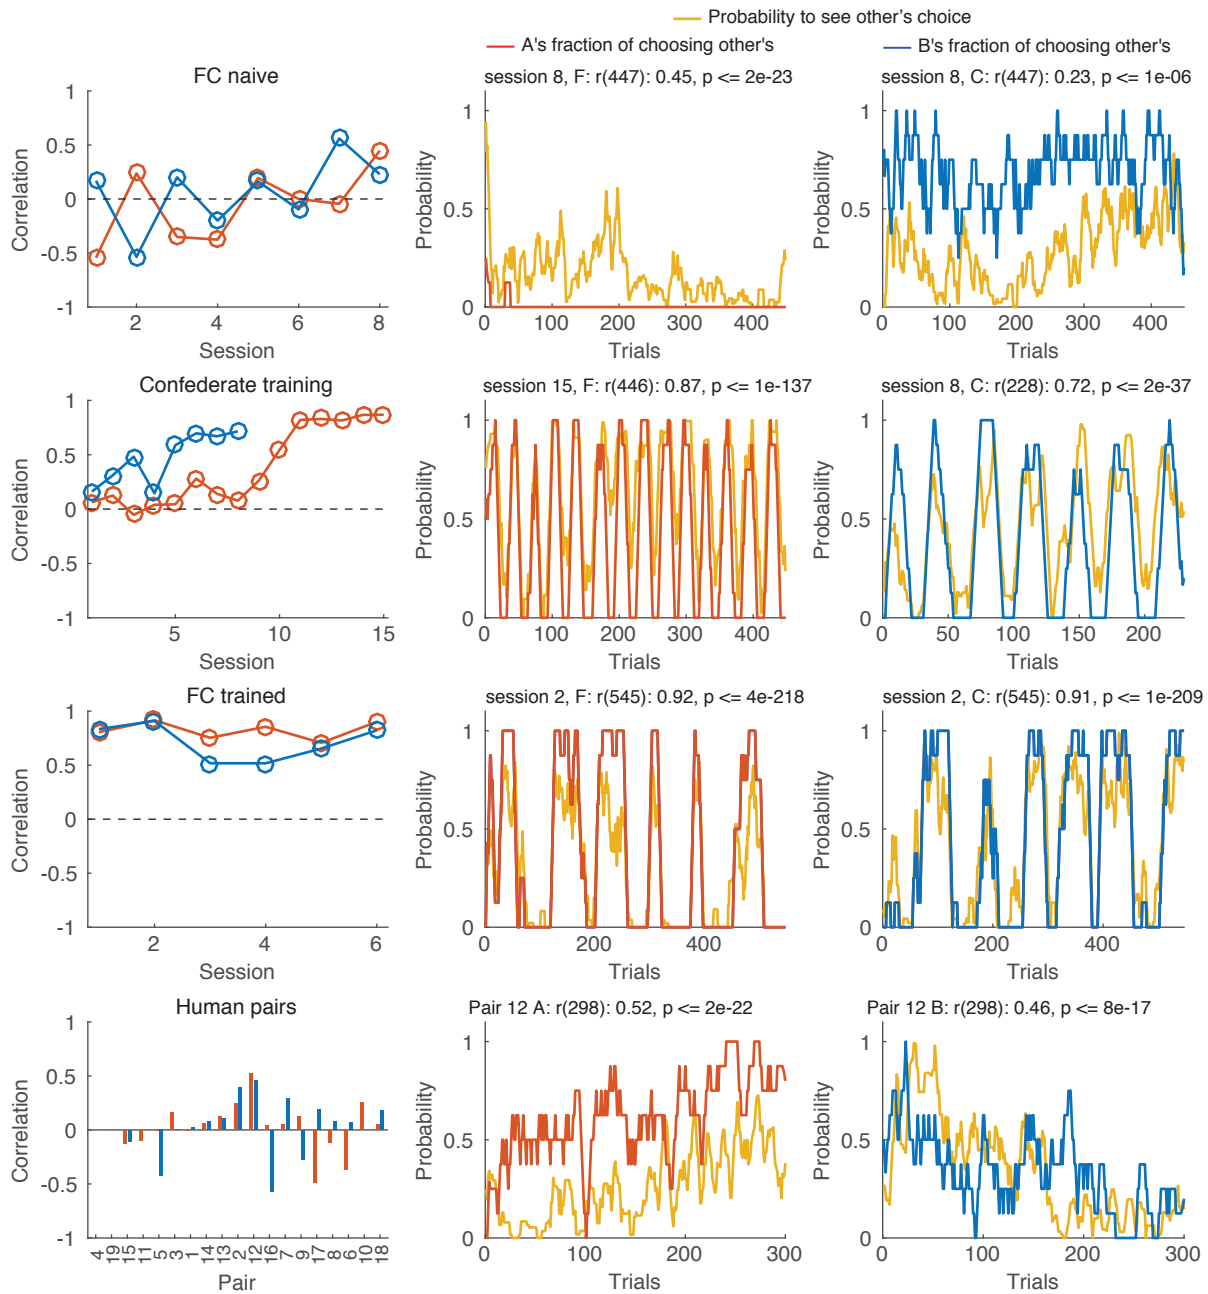

Supplement: supp [file elife-81641-supp-v1.zip]

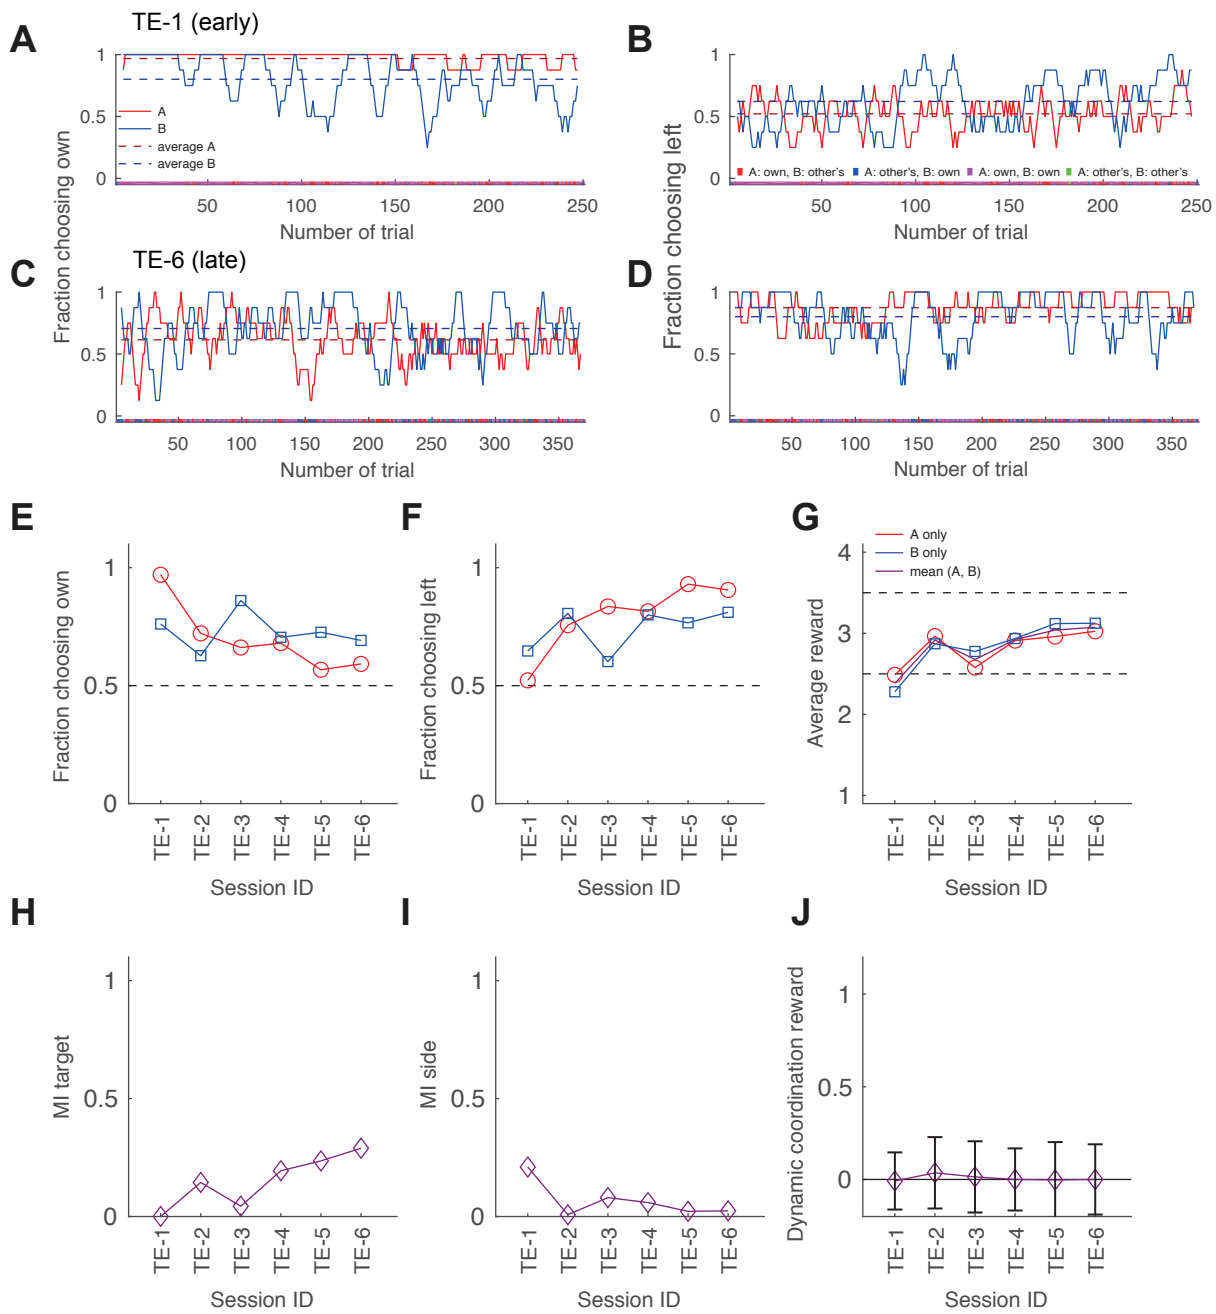

Supplement: supp [file elife-81641-supp-v1.zip]

## Human pairs

**A**

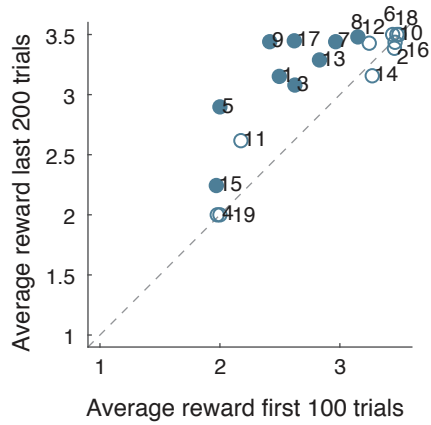

**B**

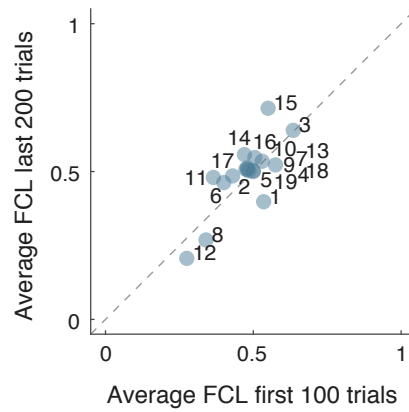

## Macaque pairs

**C**

Early session

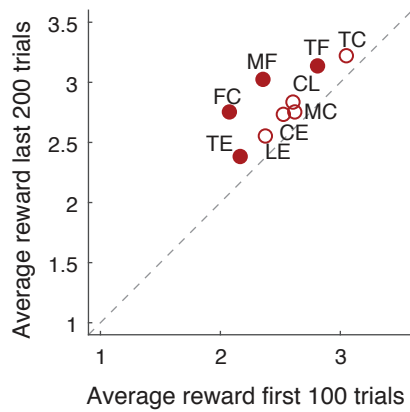

**D**

Late session

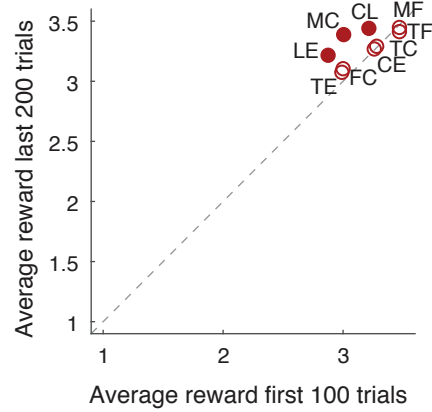

**E**

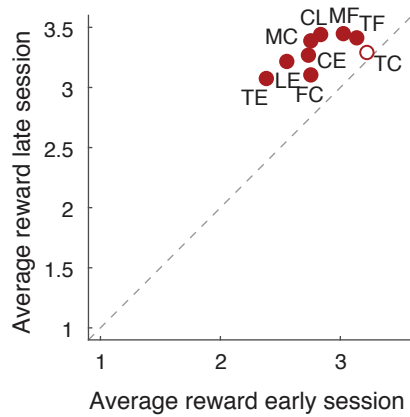

**F**

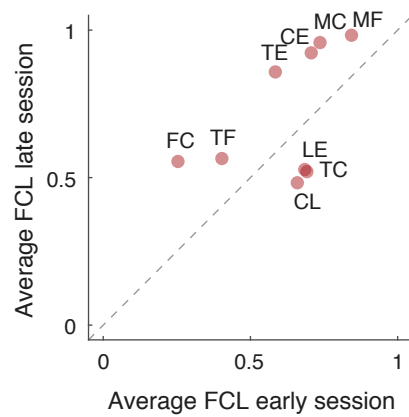

Supplement: supp [file elife-81641-supp-v1.zip]

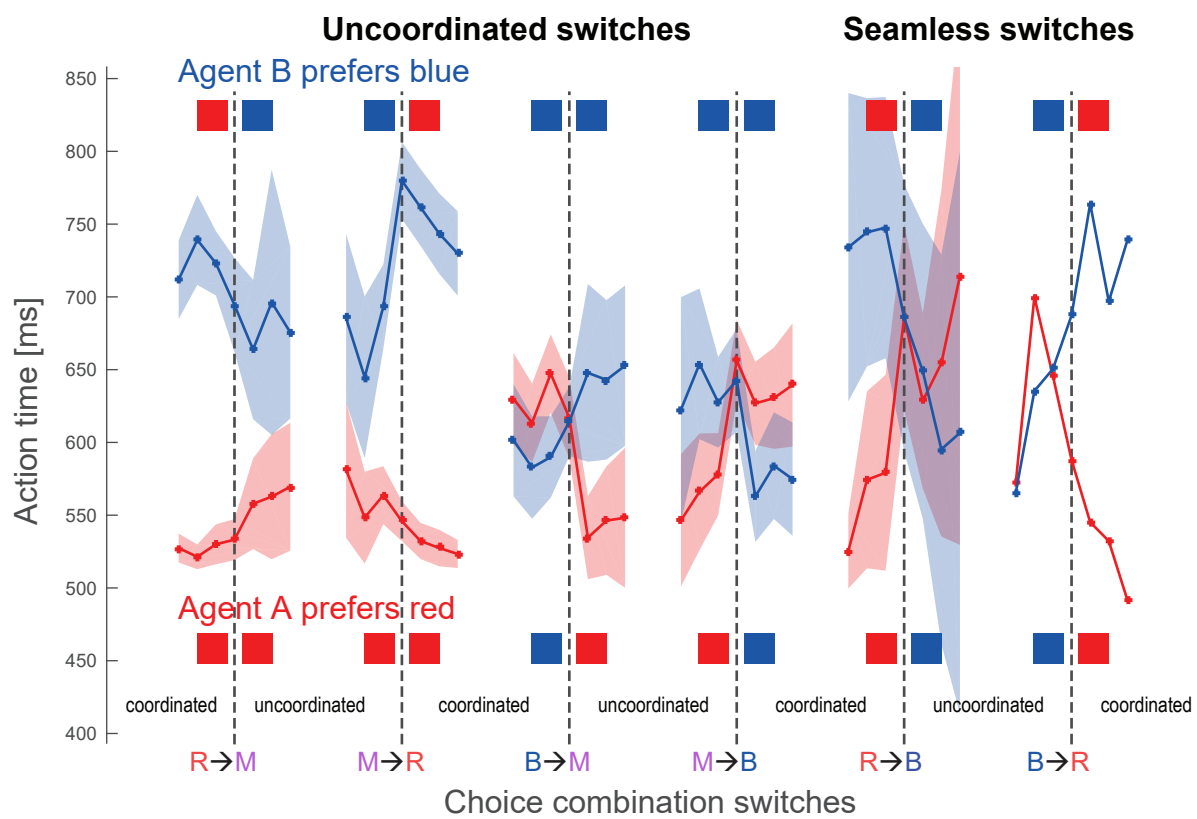

Supplement: supp [file elife-81641-supp-v1.zip]

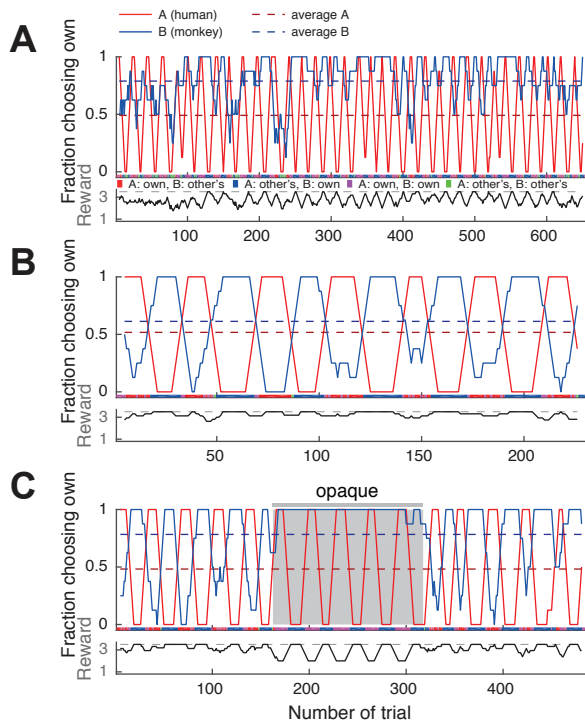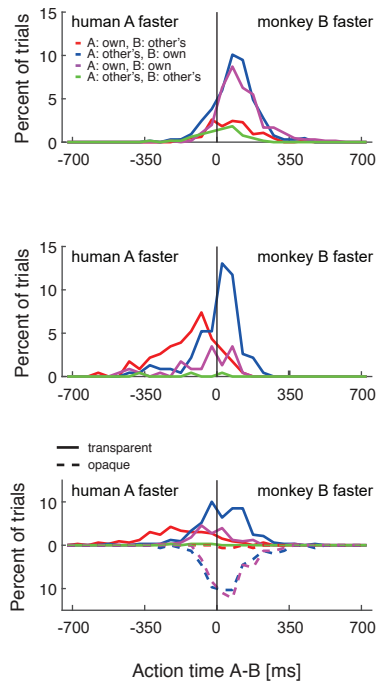

Supplement: supp [file elife-81641-supp-v1.zip]

## Human pairs

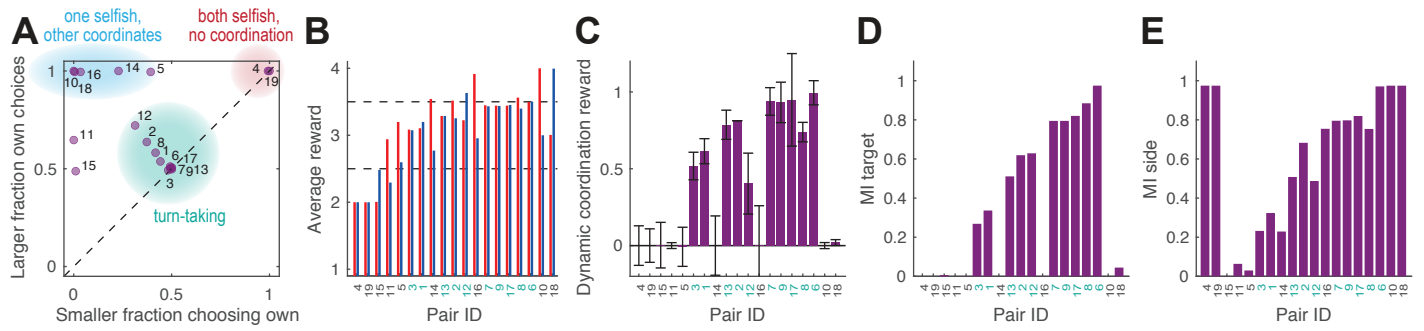

## Macaque pairs late

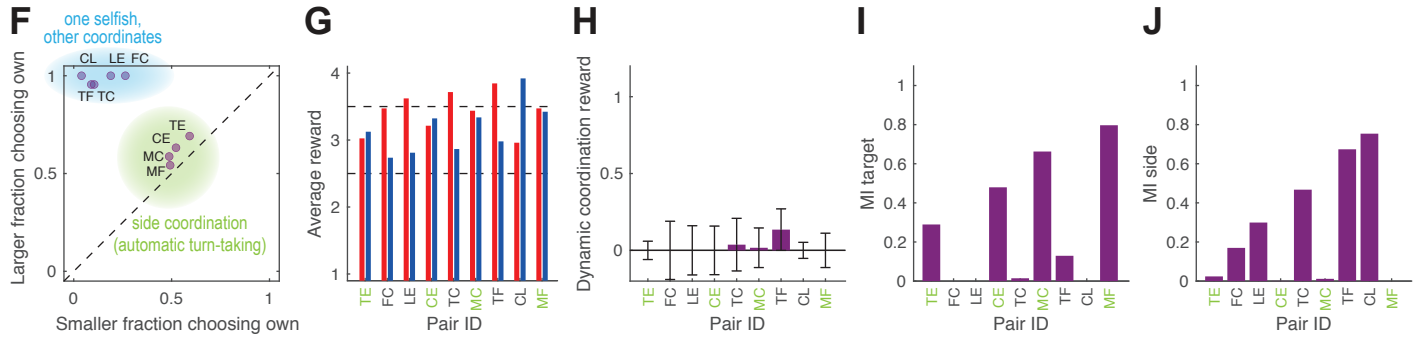

## Macaque pairs early

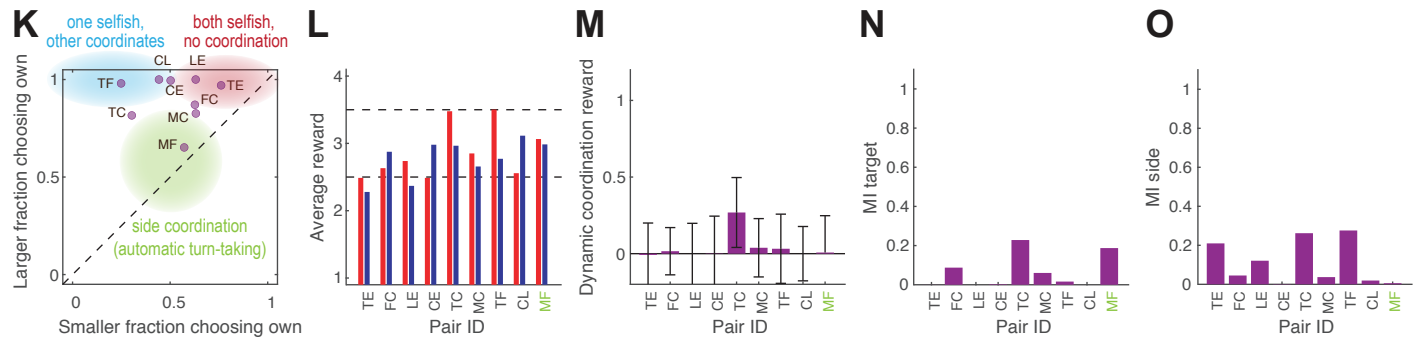

Supplement: supp [file elife-81641-supp-v1.zip]

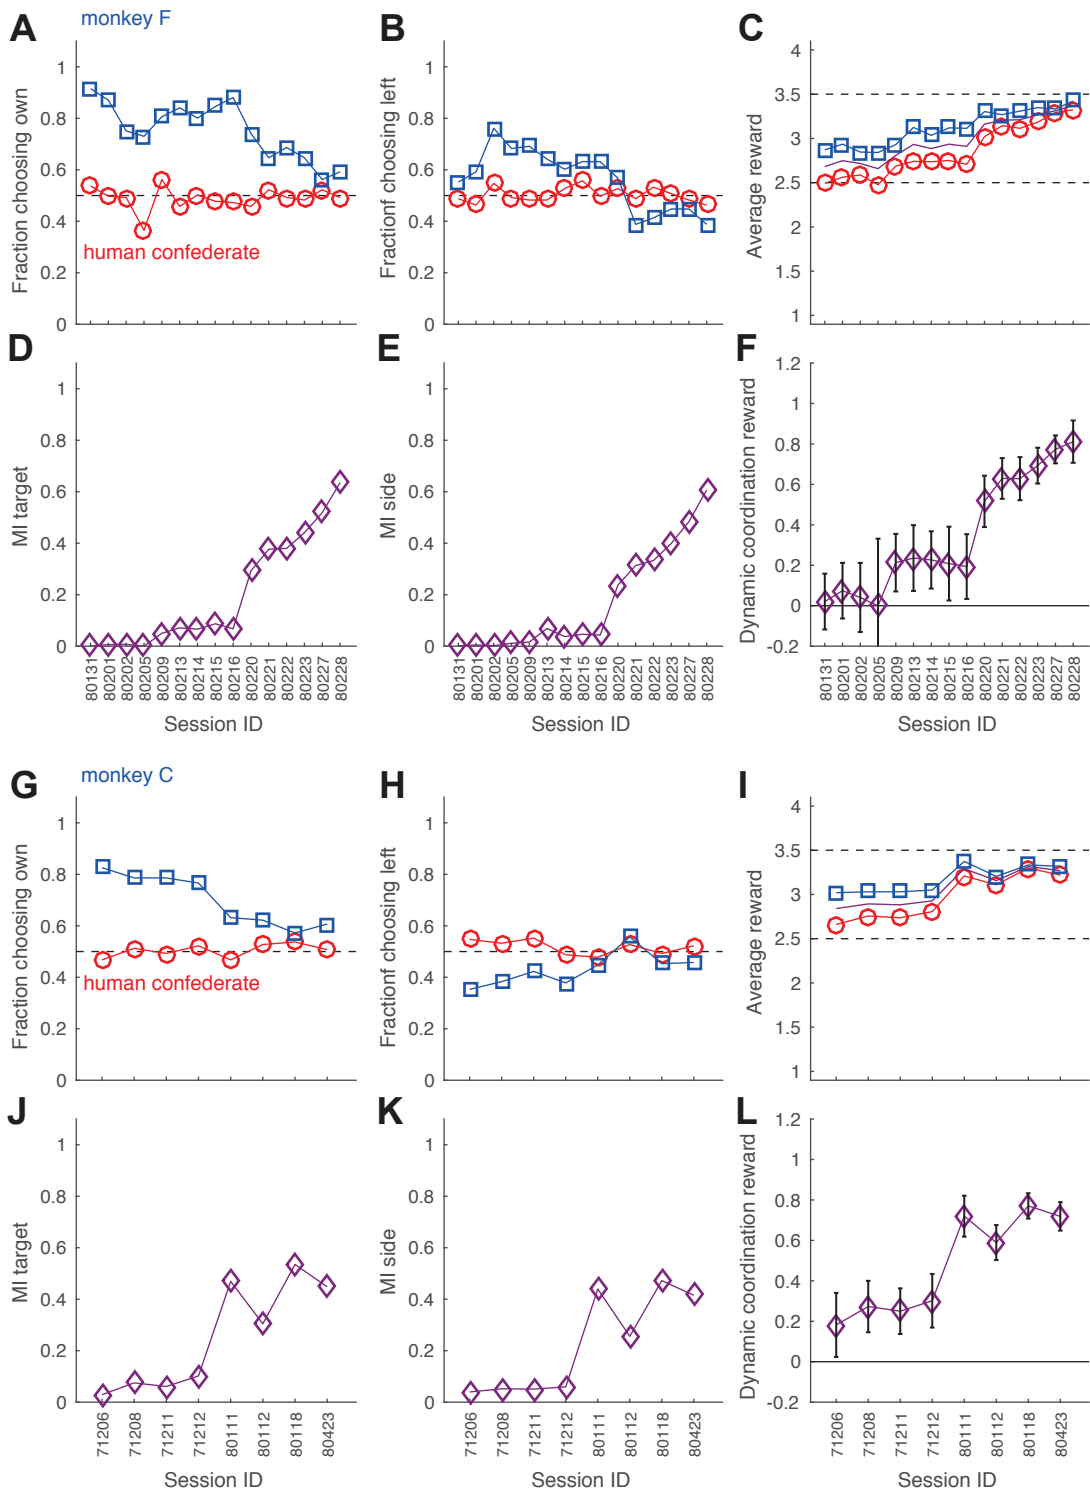

Supplement: supp [file elife-81641-supp-v1.zip]
